# Supplementary material for: The Deadly Toxin Arsenal of the Tree-Dwelling Australian Funnel-Web Spiders
Source: MDPI journal article supplement (doi:10.3390/ijms232113077), 2022-10-28
Supplement: s1 [file s1]

## Supplementary Material

**Supplementary Figure S1.** TICs of defensive venom collected from female individual specimens (two for each species, on left and right panels) of FWS. The venom profiles appear consistent within each species, exhibiting only minimal intraspecific variation (mostly related to variation in intensity of some components). From the two species of tree-dwelling FWS, the venom profile of *H. cerberea* resembles more ground dwelling species like *H. infensa*, being highly complex and with components eluting around the same time, whereas the venom profile of *H. formidabilis* appears unique, being more streamlined.

### *Hadronyche infensa*

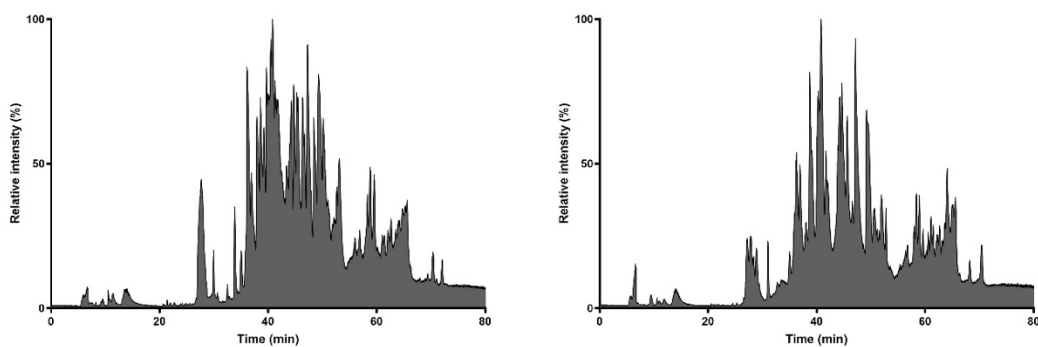

### *Hadronyche cerberea*

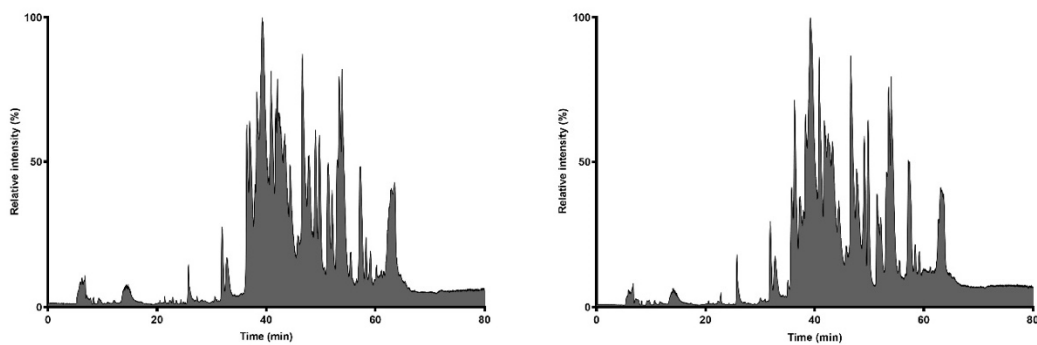

### *Hadronyche formidabilis*

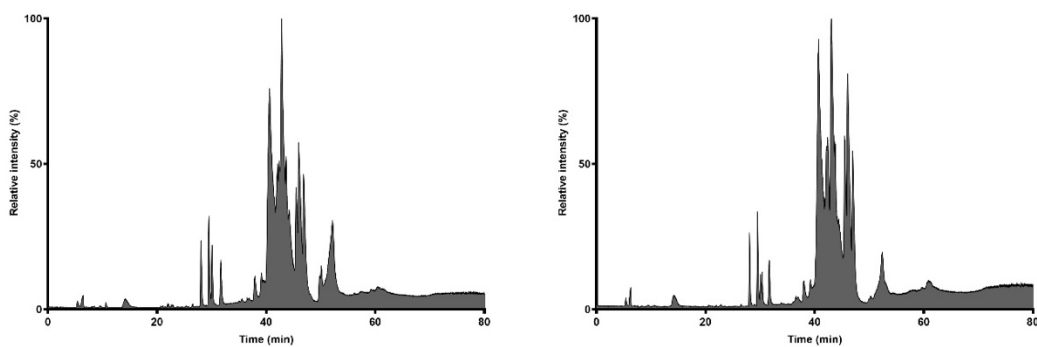

**Supplementary Figure S2. The pharmacological activities of the FWS crude venoms on mammalian voltage-gated sodium (Nav) and calcium (Cav) channel subtypes.** Tests were performed at (in ng/ml) (A) 250, (B) 25 and (C) 2.5 concentration of venom and using fluorescence-imaging cellular assays in endogenously expressed human (h) Cav channels or recombinantly expressed rat (r) or human (h) Nav channels. The enhanced responses above 100% activation of the control without venom were considered, and cut-off represented by the red dashed lines. Data are represented by mean  $\pm$  SD from  $n = 2$  specimens of *H. cerbera*, *H. infensa* or *H. formidabilis*, and by  $n = 1$  specimen of *A. robustus* (female) for each tested target. The area under the curve (AUC) was considered for these analyses.

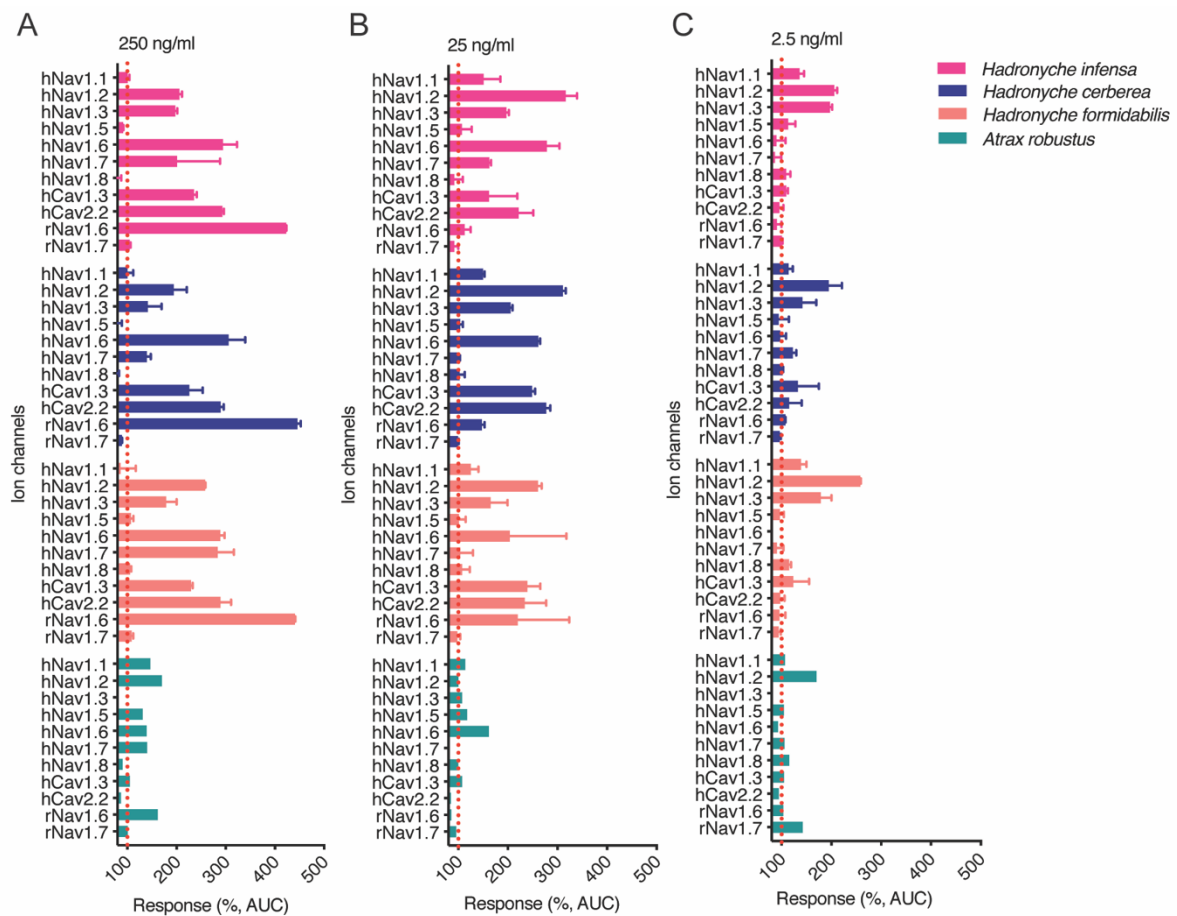

**Supplementary Figure S3. Maximum responses of ion channels elicited by assay controls.**

The standard deviation from the activation controls for each ion channel subtype assayed were described as reference for the results in Figure 6. Data are from n = 3 (Cav assays) or n = 6-9 (Nav assays), and represented as the mean  $\pm$  SD.

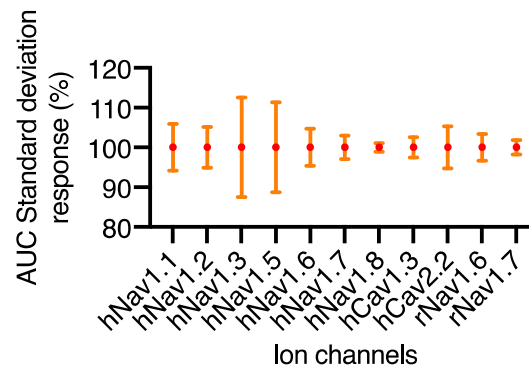

**Supplementary Table S1:** Catalogue of Superfamilies (SF) identified from the transcriptome of the venom gland of the tree-dwelling species *Hadronyche cerberea* and *Hadronyche formidabilis*. This supplementary material is provided as excel formatting.

**Supplementary Table S2:** Peptides and proteins comprised in the milked venom of tree-dwelling FWS revealed by shotgun proteomic analysis. We identified 99 peptide/protein sequences in the venom of *H. formidabilis* (A) and 127 peptide/protein sequences in the venom of *H. cerberea* (B). This supplementary material is provided as excel formatting.

**Supplementary Table S3:** Molecular Evolution of Tree-dweller vs Ground-dwelling Spider Toxin Superfamilies (table with sites and properties under selection). A detailed legend for the employed abbreviations is provided below.

| PAML (M8)                                          |    |                                 | TreeSAAP                               |                         |                                   |                                         | MEME sites |
|----------------------------------------------------|----|---------------------------------|----------------------------------------|-------------------------|-----------------------------------|-----------------------------------------|------------|
| Positive selected site                             | AA | Post mean $\pm$ SE for $\omega$ | Conservative changes in A.A properties |                         | Radical changes in A.A properties |                                         |            |
|                                                    |    |                                 | Chemical                               | Physical                | Chemical                          | Physical                                |            |
| <i>Hadronyche formidabilis</i> : True Tree Dweller |    |                                 |                                        |                         |                                   |                                         |            |
| SF13                                               |    | $\omega$ : 0.64                 |                                        |                         |                                   |                                         | 1          |
| -                                                  | -  | -                               |                                        |                         |                                   |                                         |            |
|                                                    |    |                                 |                                        |                         |                                   |                                         |            |
| SF9                                                |    | $\omega$ : 0.62                 |                                        |                         |                                   |                                         | 19         |
| -                                                  | -  | -                               |                                        |                         |                                   |                                         |            |
|                                                    |    |                                 |                                        |                         |                                   |                                         |            |
| SF10                                               |    | $\omega$ : 2.59                 |                                        | 2                       |                                   | 3                                       | 0          |
| 84                                                 | V  | $9.041 \pm 1.766$               |                                        | $pH_i$                  |                                   | $\alpha_m$                              |            |
| 85                                                 | C  | $9.033 \pm 1.786$               |                                        | $pH_i$                  |                                   | $\alpha_m$                              |            |
| 100                                                | A  | $9.026 \pm 1.806$               |                                        |                         |                                   | $R_a$                                   |            |
| -                                                  | -  | -                               |                                        |                         |                                   |                                         |            |
|                                                    |    |                                 |                                        |                         |                                   |                                         |            |
| SF4                                                |    | $\omega$ : 0.98                 |                                        | 16                      |                                   | 51                                      | 45         |
| 94                                                 | S  | $3.729 \pm 0.445$               |                                        | $N_s, M_v, H_{nc}, V^o$ |                                   | $P_c, h, \alpha_n, P$                   |            |
| 95                                                 | D  | $3.726 \pm 0.453$               |                                        | $N_s, M_v, V^o$         |                                   | $P_c, h, \alpha_n, P$                   |            |
| 101                                                | T  | $3.728 \pm 0.446$               |                                        |                         |                                   | $P_c, C_a, h, \alpha_c$                 |            |
| 102                                                | A  | $3.728 \pm 0.447$               |                                        |                         |                                   | $P_c, C_a, h, \alpha_c, E_{sm}$         |            |
| 105                                                | G  | $3.729 \pm 0.446$               |                                        |                         |                                   | $P_c, C_a, H_{nc}, \alpha_c, E_{sm}$    |            |
| 106                                                | I  | $3.727 \pm 0.451$               |                                        |                         |                                   | $P_c, C_a, h, H_{nc}, \alpha_c, E_{sm}$ |            |

|             |   |                                  |  |                             |  |                                       |          |
|-------------|---|----------------------------------|--|-----------------------------|--|---------------------------------------|----------|
| 108         | V | $3.714 \pm 0.488$                |  |                             |  | $P_c, C_a, h, E_l, H_{nc}, E_{sm}$    |          |
| 114         | S | $3.658 \pm 0.616$                |  | $P_\alpha, M_v, V^\circ$    |  | $P_c, h, H_{nc}, \alpha_n, E_{sm}, P$ |          |
| 115         | A | $3.723 \pm 0.462$                |  | $P_\alpha, M_v, V^\circ$    |  | $P_c, h, H_{nc}, \alpha_n, E_{sm}, P$ |          |
| 118         | C | $3.723 \pm 0.461$                |  | $P_\alpha, V^\circ, E_{sm}$ |  | $P_c, h, H_{nc}, \alpha_n, P$         |          |
|             |   |                                  |  |                             |  |                                       |          |
| <b>SF26</b> |   | <b><math>\omega: 1.55</math></b> |  | <b>14</b>                   |  | <b>53</b>                             | <b>6</b> |
| 62          | L | $5.119 \pm 0.560$                |  | $p$                         |  | $h, \alpha_n$                         |          |
| 64          | G | $5.081 \pm 0.687$                |  | $p$                         |  | $K^\circ, h, \alpha_n$                |          |
| 65          | S | $5.055 \pm 0.759$                |  | $p$                         |  | $K^\circ, h, \alpha_n$                |          |
| 67          | C | $4.934 \pm 1.026$                |  | $p$                         |  | $K^\circ, h, \alpha_n$                |          |
| 68          | A | $5.120 \pm 0.559$                |  | $p$                         |  | $K^\circ, h, \alpha_n$                |          |
| 69          | R | $5.107 \pm 0.605$                |  |                             |  | $K^\circ, h, \alpha_n$                |          |
| 70          | T | $5.088 \pm 0.663$                |  |                             |  | $K^\circ, h, \alpha_n$                |          |
| 72          | S | $5.098 \pm 0.634$                |  |                             |  | $K^\circ, h$                          |          |
| 73          | A | $4.976 \pm 0.936$                |  | $p$                         |  | $K^\circ, h$                          |          |
| 75          | S | $5.115 \pm 0.574$                |  | $p$                         |  | $K^\circ, h, \alpha_n$                |          |
| 76          | G | $5.062 \pm 0.738$                |  |                             |  | $K^\circ, h, \alpha_n$                |          |
| 80          | N | $5.093 \pm 0.649$                |  | $p$                         |  | $K^\circ, h, \alpha_n$                |          |
| 82          | C | $5.119 \pm 0.560$                |  | $p$                         |  | $K^\circ, h, \alpha_n$                |          |
| 83          | Y | $5.120 \pm 0.559$                |  | $p$                         |  | $K^\circ, h, \alpha_n$                |          |
| 84          | I | $5.119 \pm 0.561$                |  | $p$                         |  | $K^\circ, h, \alpha_n$                |          |
| 85          | C | $5.119 \pm 0.559$                |  | $p$                         |  | $K^\circ, h, \alpha_n$                |          |
| 86          | L | $5.119 \pm 0.559$                |  | $p$                         |  | $K^\circ, h, \alpha_n$                |          |
| 87          | L | $5.119 \pm 0.559$                |  | $p$                         |  | $K^\circ, h, \alpha_n$                |          |
| 89          | S | $5.119 \pm 0.560$                |  |                             |  | $H$                                   |          |
| 90          | S | $5.108 \pm 0.600$                |  |                             |  | $H$                                   |          |
| 91          | M | $5.115 \pm 0.574$                |  |                             |  |                                       |          |

| <i>Hadronyche cerberea</i> : Newly Adapted Tree Dweller |   |                    |  |       |  |                         |    |
|---------------------------------------------------------|---|--------------------|--|-------|--|-------------------------|----|
| SF13                                                    |   | $\omega$ : 0.20    |  |       |  |                         | 0  |
| -                                                       | - | -                  |  |       |  |                         |    |
|                                                         |   |                    |  |       |  |                         |    |
| SF9                                                     |   | $\omega$ : 1.90    |  |       |  |                         | 1  |
| 78                                                      | G | $9.419 \pm 1.285$  |  |       |  |                         |    |
| 79                                                      | N | $9.111 \pm 2.044$  |  |       |  |                         |    |
|                                                         |   |                    |  |       |  |                         |    |
| SF10                                                    |   | $\omega$ : 0.75    |  |       |  |                         | 1  |
| -                                                       | - | -                  |  |       |  |                         |    |
|                                                         |   |                    |  |       |  |                         |    |
| SF4                                                     |   | $\omega$ : 2.85    |  | 19    |  | 72                      | 18 |
| 95                                                      | D | $10.108 \pm 1.841$ |  | $C_a$ |  | $B_l, P_c, h, \alpha_m$ |    |
| 96                                                      | N | $10.422 \pm 0.712$ |  | $C_a$ |  | $B_l, P_c, h, \alpha_m$ |    |
| 97                                                      | D | $10.469 \pm 0.238$ |  | $C_a$ |  | $B_l, P_c, h, \alpha_m$ |    |
| 98                                                      | V | $10.472 \pm 0.167$ |  | $C_a$ |  | $B_l, P_c, h, \alpha_m$ |    |
| 99                                                      | L | $10.424 \pm 0.700$ |  |       |  | $B_l, h, \alpha_m$      |    |
| 101                                                     | T | $10.471 \pm 0.193$ |  |       |  | $B_l, P_c, \alpha_m$    |    |
| 102                                                     | V | $10.471 \pm 0.202$ |  |       |  | $B_l, P_c, \alpha_m$    |    |
| 103                                                     | G | $10.412 \pm 0.780$ |  |       |  | $B_l, P_c, h, \alpha_m$ |    |
| 105                                                     | G | $10.472 \pm 0.166$ |  |       |  | $B_l, P_c, \alpha_m$    |    |
| 106                                                     | G | $10.472 \pm 0.165$ |  |       |  | $B_l, P_c, h, \alpha_m$ |    |
| 107                                                     | N | $10.472 \pm 0.165$ |  |       |  | $B_l, P_c, h, \alpha_m$ |    |
| 108                                                     | V | $10.472 \pm 0.165$ |  |       |  | $B_l, P_c, h, \alpha_m$ |    |
| 109                                                     | I | $10.472 \pm 0.167$ |  | $C_a$ |  | $B_l, P_c, h, \alpha_m$ |    |
| 110                                                     | V | $10.472 \pm 0.165$ |  | $C_a$ |  | $B_l, P_c, h, \alpha_m$ |    |

|             |   |                                  |           |               |  |                                           |           |
|-------------|---|----------------------------------|-----------|---------------|--|-------------------------------------------|-----------|
| 112         | G | $10.472 \pm 0.165$               |           | $Bl, Ca$      |  | $B_l, P_c, h, \alpha_m$                   |           |
| 113         | F | $10.472 \pm 0.177$               |           | $Bl, Ca$      |  | $B_l, P_c, \alpha_m$                      |           |
| 114         | S | $10.472 \pm 0.165$               |           | $Bl, Ca$      |  | $P_c, h, \alpha_m$                        |           |
| 115         | L | $10.472 \pm 0.173$               |           | $Bl, Ca$      |  | $P_c, h, \alpha_m$                        |           |
| 116         | F | $10.472 \pm 0.167$               |           | $Bl, Ca$      |  | $P_c, h, \alpha_m$                        |           |
| 117         | Q | $10.472 \pm 0.165$               |           | $Bl, Ca$      |  | $P_c, \alpha_m$                           |           |
| 118         | C | $10.472 \pm 0.165$               |           | $Ca$          |  | $P_c$                                     |           |
| 119         | W | $10.472 \pm 0.165$               |           |               |  |                                           |           |
| 120         | G | $10.151 \pm 1.741$               |           |               |  |                                           |           |
|             |   |                                  |           |               |  |                                           |           |
| <b>SF26</b> |   | <b><math>\omega: 1.85</math></b> | <b>12</b> | <b>6</b>      |  | <b>81</b>                                 | <b>18</b> |
| 61          | K | $6.238 \pm 0.834$                | $pK'$     |               |  | $pH_i, \alpha_n, R_a$                     |           |
| 62          | E | $6.289 \pm 0.675$                | $pK'$     |               |  | $K^\circ, pH_i, \alpha_n$                 |           |
| 63          | N | $6.284 \pm 0.693$                | $pK'$     |               |  | $K^\circ, pH_i, \alpha_n$                 |           |
| 66          | G | $6.276 \pm 0.724$                |           |               |  | $K^\circ, \alpha_n$                       |           |
| 67          | C | $6.068 \pm 1.232$                |           |               |  | $K^\circ, \alpha_n$                       |           |
| 69          | R | $6.297 \pm 0.647$                |           |               |  | $K^\circ, h, \alpha_n, E_{sm}$            |           |
| 70          | T | $6.296 \pm 0.648$                |           |               |  | $K^\circ, h, \alpha_n, E_{sm}$            |           |
| 72          | S | $6.296 \pm 0.648$                |           | $\alpha_m$    |  | $K^\circ, h, \alpha_n, E_{sm}$            |           |
| 73          | A | $6.187 \pm 0.981$                |           | $\alpha_m$    |  | $K^\circ, h, \alpha_n, E_{sm}$            |           |
| 77          | G | $6.251 \pm 0.807$                |           | $\alpha_m, P$ |  | $K^\circ, h, \alpha_n, E_{sm}, R_a$       |           |
| 79          | V | $6.295 \pm 0.654$                |           | $P$           |  | $K^\circ, h, \alpha_n, E_{sm}, R_a$       |           |
| 80          | N | $6.259 \pm 0.782$                |           | $P$           |  | $K^\circ, h, \alpha_n, E_{sm}, R_a$       |           |
| 81          | E | $6.270 \pm 0.748$                | $pK'$     |               |  | $K^\circ, h, \alpha_n, E_{sm}, R_a$       |           |
| 82          | R | $6.297 \pm 0.647$                | $pK'$     |               |  | $K^\circ, h, \alpha_n, E_{sm}, R_a$       |           |
| 83          | Y | $6.297 \pm 0.648$                | $pK'$     |               |  | $K^\circ, h, pH_i, \alpha_n, E_{sm}, R_a$ |           |
| 84          | I | $6.296 \pm 0.651$                | $pK'$     |               |  | $K^\circ, h, pH_i, \alpha_n$              |           |
| 85          | C | $6.297 \pm 0.647$                | $pK'$     |               |  | $K^\circ, h, pH_i, \alpha_n$              |           |



|                                                      |   |                                  |       |                            |  |                                |          |
|------------------------------------------------------|---|----------------------------------|-------|----------------------------|--|--------------------------------|----------|
| 86                                                   | N | $6.249 \pm 0.819$                | $pK'$ |                            |  | $K^{\circ}, h, pH_i, \alpha_n$ |          |
| 87                                                   | L | $6.296 \pm 0.649$                | $pK'$ |                            |  | $K^{\circ}, h, \alpha_n$       |          |
| 88                                                   | E | $6.296 \pm 0.648$                | $pK'$ |                            |  | $h, \alpha_n$                  |          |
| 89                                                   | S | $6.297 \pm 0.648$                | $pK'$ |                            |  | $\alpha_n$                     |          |
| 90                                                   | S | $6.296 \pm 0.648$                |       |                            |  | $\alpha_n$                     |          |
| 91                                                   | M | $6.296 \pm 0.648$                |       |                            |  | $\alpha_n$                     |          |
| 92                                                   | C | $6.295 \pm 0.655$                |       |                            |  | $\alpha_n$                     |          |
|                                                      |   |                                  |       |                            |  |                                |          |
| <b>Ground Dwelling Spiders from Atracidae Family</b> |   |                                  |       |                            |  |                                |          |
| <b>SF13</b>                                          |   | <b><math>\omega</math>: 1.58</b> |       | <b>32</b>                  |  | <b>7</b>                       | <b>8</b> |
| 95                                                   | G | $7.548 \pm 0.854$                |       | $C_a$                      |  |                                |          |
| 96                                                   | A | $7.540 \pm 0.881$                |       | $C_a$                      |  |                                |          |
| 97                                                   | w | $7.581 \pm 0.721$                |       | $C_a$                      |  | $M_v$                          |          |
| 98                                                   | Y | $7.581 \pm 0.720$                |       | $C_a$                      |  | $M_v$                          |          |
| 100                                                  | Q | $7.582 \pm 0.720$                |       | $C_a, M_v, V^{\circ}, \mu$ |  |                                |          |
| 101                                                  | Q | $7.567 \pm 0.781$                |       | $C_a, M_v, V^{\circ}, \mu$ |  |                                |          |
| 102                                                  | S | $7.581 \pm 0.720$                |       | $C_a, M_v, V^{\circ}, \mu$ |  |                                |          |
| 103                                                  | S | $7.582 \pm 0.720$                |       | $C_a, M_v, V^{\circ}, \mu$ |  |                                |          |
| 105                                                  | Q | $7.582 \pm 0.720$                |       | $C_a, M_v, V^{\circ}, \mu$ |  |                                |          |
| 106                                                  | S | $7.582 \pm 0.720$                |       | $C_a, M_v, V^{\circ}, \mu$ |  |                                |          |
| 107                                                  | T | $7.582 \pm 0.720$                |       | $C_a, V^{\circ}, \mu$      |  | $M_v$                          |          |
| 109                                                  | M | $7.582 \pm 0.720$                |       | $\mu$                      |  | $M_v$                          |          |
| 110                                                  | G | $7.581 \pm 0.722$                |       |                            |  | $M_v$                          |          |
| 111                                                  | M | $7.582 \pm 0.720$                |       |                            |  | $M_v$                          |          |
| 112                                                  | F | $7.581 \pm 0.720$                |       |                            |  | $M_v$                          |          |
| 114                                                  | K | $7.582 \pm 0.720$                |       |                            |  |                                |          |
| 115                                                  | C | $7.465 \pm 1.111$                |       |                            |  |                                |          |

|             |   |                                  |  |                               |          |                                                                                              |           |
|-------------|---|----------------------------------|--|-------------------------------|----------|----------------------------------------------------------------------------------------------|-----------|
|             |   |                                  |  |                               |          |                                                                                              |           |
| <b>SF9</b>  |   | <b><math>\omega</math>: 0.64</b> |  |                               |          |                                                                                              | <b>15</b> |
| -           | - | -                                |  |                               |          |                                                                                              |           |
|             |   |                                  |  |                               |          |                                                                                              |           |
| <b>SF10</b> |   | <b><math>\omega</math>: 0.94</b> |  | <b>14</b>                     | <b>9</b> |                                                                                              | <b>8</b>  |
| 58          | V | $3.304 \pm 0.624$                |  | $P_\alpha, F, \alpha_n, R_a$  |          |                                                                                              |           |
| 80          | S | $3.324 \pm 0.592$                |  |                               | $pK'$    |                                                                                              |           |
| 81          | C | $3.380 \pm 0.469$                |  |                               | $pK'$    |                                                                                              |           |
| 82          | T | $3.306 \pm 0.617$                |  |                               | $pK'$    |                                                                                              |           |
| 87          | A | $3.370 \pm 0.491$                |  |                               | $pK'$    |                                                                                              |           |
| 93          | L | $3.340 \pm 0.555$                |  | $P_\alpha, R_a$               |          |                                                                                              |           |
| 97          | L | $3.304 \pm 0.622$                |  | $P_\alpha, \alpha_m$          | $pK'$    |                                                                                              |           |
| 98          | L | $3.386 \pm 0.453$                |  | $P_\alpha, \alpha_m$          | $pK'$    |                                                                                              |           |
| 99          | G | $3.272 \pm 0.680$                |  | $P_\alpha, \alpha_m$          | $pK'$    |                                                                                              |           |
| 101         | A | $3.386 \pm 0.452$                |  | $\alpha_m$                    | $pK'$    |                                                                                              |           |
| 102         | L | $3.384 \pm 0.457$                |  | $\alpha_m$                    | $pK'$    |                                                                                              |           |
|             |   |                                  |  |                               |          |                                                                                              |           |
| <b>SF4</b>  |   | <b><math>\omega</math>: 1.42</b> |  | <b>59</b>                     |          | <b>327</b>                                                                                   | <b>73</b> |
| 49          | Q | $4.750 \pm 0.013$                |  | $P_\alpha, V^\circ, \alpha_m$ |          | $\alpha_c, R_a$                                                                              |           |
| 85          | E | $4.738 \pm 0.217$                |  | $N_s, c, pH_i, H_p$           |          | $B_l, B_r, P_c, K^\circ, h, F, M_v, M_w, V^\circ, \alpha_c, \alpha_n, \mu, E_{sm}, R_a, H_t$ |           |
| 86          | T | $4.750 \pm 0.000$                |  | $N_s, c, pH_i$                |          | $B_l, B_r, P_c, K^\circ, h, F, M_v, M_w, V^\circ, \alpha_c, \alpha_n, \mu, R_a, H_p, H_t$    |           |
| 88          | F | $4.749 \pm 0.064$                |  | $N_s, c, pH_i$                |          | $B_r, P_c, K^\circ, h, F, M_w, H_{nc}, \alpha_c, \alpha_n, R_a, H_p, H_t$                    |           |
| 90          | S | $4.750 \pm 0.035$                |  | $N_s, c$                      |          | $B_r, P_c, K^\circ, h, M_w, H_{nc}, \alpha_c, \alpha_n, R_a, H_p, H_t$                       |           |
| 91          | D | $4.725 \pm 0.307$                |  | $N_s$                         |          | $B_r, P_c, K^\circ, h, M_w, H_{nc}, \alpha_c, \alpha_n, R_a, H_p, H_t$                       |           |

|     |   |                   |  |                                |  |                                                                                         |  |
|-----|---|-------------------|--|--------------------------------|--|-----------------------------------------------------------------------------------------|--|
| 93  | T | $4.750 \pm 0.007$ |  | $c$                            |  | $B_r, P_c, K^\circ, h, F, M_v, M_w, H_{nc}, V^\circ, \alpha_c, \alpha_n, \mu, H_p, H_t$ |  |
| 94  | S | $4.750 \pm 0.000$ |  | $c$                            |  | $B_r, P_c, K^\circ, h, F, M_v, M_w, H_{nc}, V^\circ, \alpha_c, \alpha_n, \mu, H_p, H_t$ |  |
| 95  | N | $4.741 \pm 0.185$ |  | $c, P_r$                       |  | $B_r, K^\circ, h, F, M_v, M_w, H_{nc}, V^\circ, \alpha_c, \alpha_n, \mu, E_{sm}, H_p$   |  |
| 98  | A | $4.750 \pm 0.000$ |  | $P_r, p$                       |  | $B_l, B_r, K^\circ, C_a, h, F, M_v, M_w, V^\circ, \mu, E_{sm}, H_p, H_t$                |  |
| 99  | L | $4.750 \pm 0.012$ |  | $P_r, p$                       |  | $B_l, B_r, K^\circ, C_a, h, F, M_v, M_w, V^\circ, \mu, E_{sm}, H_t$                     |  |
| 100 | N | $4.750 \pm 0.023$ |  | $P_\omega, P_r, p$             |  | $B_l, B_r, K^\circ, C_a, h, F, M_v, M_w, V^\circ, \mu, E_{sm}, H_t$                     |  |
| 101 | T | $4.750 \pm 0.000$ |  | $P_\omega, P_r, p$             |  | $B_l, C_a, h, F, M_v, M_w, V^\circ, \mu$                                                |  |
| 102 | V | $4.750 \pm 0.000$ |  | $P_\omega, P_r, p$             |  | $B_l, C_a, h, M_v, M_w$                                                                 |  |
| 103 | G | $4.750 \pm 0.000$ |  | $P_\omega, pH_i, P_r$          |  | $B_l, C_a, M_v$                                                                         |  |
| 104 | Q | $4.750 \pm 0.000$ |  | $P_\omega, pH_i, P_r$          |  | $h, M_v, H_{nc}, E_{sm}$                                                                |  |
| 105 | G | $4.750 \pm 0.001$ |  | $P_\omega, pH_i, V^\circ, P_r$ |  | $B_l, h, M_v, H_{nc}, E_{sm}, R_a$                                                      |  |
| 106 | L | $4.750 \pm 0.000$ |  | $pH_i, V^\circ$                |  | $B_l, h, M_v, H_{nc}, E_{sm}, R_a, H_p$                                                 |  |
| 107 | N | $4.718 \pm 0.349$ |  | $pH_i$                         |  | $B_l, P_c, h, F, M_v, M_w, H_{nc}, V^\circ, \mu, E_{sm}, R_a, H_p, H_t$                 |  |
| 108 | V | $4.750 \pm 0.000$ |  | $pH_i$                         |  | $B_l, P_c, h, F, M_v, M_w, H_{nc}, V^\circ, \mu, E_{sm}, R_a, H_p, H_t$                 |  |
| 109 | V | $4.750 \pm 0.000$ |  | $pH_i$                         |  | $B_l, P_c, h, F, M_v, M_w, H_{nc}, V^\circ, \mu, E_{sm}, R_a, H_p, H_t$                 |  |
| 110 | S | $4.750 \pm 0.000$ |  | $pH_i$                         |  | $B_l, P_c, h, F, M_v, M_w, H_{nc}, V^\circ, \mu, E_{sm}, R_a, H_p, H_t$                 |  |
| 112 | G | $4.750 \pm 0.008$ |  | $pH_i$                         |  | $B_l, P_c, h, F, M_v, M_w, H_{nc}, V^\circ, \mu, E_{sm}, R_a, H_p, H_t$                 |  |

|             |   |                                  |  |             |  |                                                                                                      |           |
|-------------|---|----------------------------------|--|-------------|--|------------------------------------------------------------------------------------------------------|-----------|
| 113         | L | $4.655 \pm 0.605$                |  | $pH_i$      |  | $B_l, P_c, K^\circ, h, F, M_v, M_w, H_{nc}, V^\circ, \alpha_n, \mu, E_{sm}, R_a, H_p, H_t$           |           |
| 114         | S | $4.750 \pm 0.023$                |  | $pH_i$      |  | $B_l, P_c, K^\circ, h, F, M_v, M_w, H_{nc}, V^\circ, \alpha_n, \mu, E_{sm}, R_a, H_p, H_t$           |           |
| 115         | A | $4.750 \pm 0.006$                |  | $pH_i$      |  | $B_l, P_c, K^\circ, h, F, M_v, M_w, H_{nc}, V^\circ, \alpha_c, \alpha_n, \mu, E_{sm}, R_a, H_p, H_t$ |           |
| 116         | F | $4.729 \pm 0.287$                |  | $pH_i$      |  | $B_l, P_c, K^\circ, h, F, M_v, M_w, H_{nc}, V^\circ, \alpha_c, \alpha_n, \mu, E_{sm}, R_a, H_p, H_t$ |           |
| 117         | Q | $4.750 \pm 0.003$                |  | $pH_i, H_t$ |  | $P_c, K^\circ, h, M_w, H_{nc}, \alpha_c, \alpha_n, R_a, H_p$                                         |           |
| 118         | C | $4.750 \pm 0.000$                |  | $pH_i, H_t$ |  | $P_c, K^\circ, h, M_w, H_{nc}, \alpha_c, \alpha_n, R_a, H_p$                                         |           |
| 119         | W | $4.750 \pm 0.000$                |  | $H_t$       |  | $P_c, K^\circ, \alpha_c, R_a$                                                                        |           |
|             |   |                                  |  |             |  |                                                                                                      |           |
| <b>SF26</b> |   | <b><math>\omega: 1.18</math></b> |  | <b>10</b>   |  | <b>119</b>                                                                                           | <b>14</b> |
| 51          | R | $2.783 \pm 0.458$                |  |             |  | $B_l, K^\circ, h, \alpha_c, \alpha_n, R_a$                                                           |           |
| 61          | K | $2.725 \pm 0.550$                |  | $P_r$       |  | $B_l, h, E_l, F, \alpha_n, R_a$                                                                      |           |
| 62          | T | $2.763 \pm 0.494$                |  | $p, \mu$    |  | $B_l, K^\circ, h, E_l, F, \alpha_n, R_a$                                                             |           |
| 63          | Y | $2.766 \pm 0.488$                |  | $p, \mu$    |  | $B_l, K^\circ, h, E_l, F, \alpha_n, R_a$                                                             |           |
| 67          | C | $2.710 \pm 0.586$                |  | $p$         |  | $Bl, K^\circ, F, \alpha_n, R_a$                                                                      |           |
| 70          | T | $2.785 \pm 0.454$                |  | $p$         |  | $K^\circ, h, \alpha_n$                                                                               |           |
| 71          | W | $2.758 \pm 0.503$                |  | $p$         |  | $K^\circ, h, E_l, \alpha_n, R_a$                                                                     |           |
| 72          | S | $2.782 \pm 0.460$                |  | $p$         |  | $B_l, K^\circ, h, E_l, \alpha_n, R_a$                                                                |           |
| 74          | M | $2.761 \pm 0.496$                |  | $p$         |  | $B_l, K^\circ, h, E_l, \alpha_n, R_a$                                                                |           |
| 77          | G | $2.721 \pm 0.562$                |  |             |  | $B_l, K^\circ, h, E_l, \alpha_n, R_a$                                                                |           |
| 80          | R | $2.774 \pm 0.475$                |  |             |  | $h, E_l, \alpha_c$                                                                                   |           |
| 81          | E | $2.716 \pm 0.561$                |  |             |  | $h, E_l, \alpha_c$                                                                                   |           |
| 82          | C | $2.786 \pm 0.452$                |  |             |  | $h, E_l, \alpha_c, \alpha_n$                                                                         |           |
| 83          | Y | $2.784 \pm 0.456$                |  |             |  | $h, E_l, \alpha_c, \alpha_n$                                                                         |           |
| 84          | I | $2.723 \pm 0.555$                |  |             |  | $h, E_l, \alpha_c, \alpha_n, R_a$                                                                    |           |

|    |   |                   |  |  |  |                                        |  |
|----|---|-------------------|--|--|--|----------------------------------------|--|
| 85 | C | $2.744 \pm 0.530$ |  |  |  | $h, E_l, \alpha_c, \alpha_n, R_a$      |  |
| 86 | A | $2.750 \pm 0.518$ |  |  |  | $K^o, h, E_l, \alpha_c, \alpha_n, R_a$ |  |
| 87 | V | $2.786 \pm 0.453$ |  |  |  | $K^o, h, E_l, \alpha_c, \alpha_n, R_a$ |  |
| 88 | E | $2.771 \pm 0.478$ |  |  |  | $K^o, h, E_l, \alpha_c, \alpha_n, R_a$ |  |
| 89 | S | $2.731 \pm 0.545$ |  |  |  | $K^o, h, E_l, \alpha_c, R_a$           |  |
| 90 | S | $2.755 \pm 0.509$ |  |  |  | $K^o, h, E_l, \alpha_c, R_a$           |  |
| 91 | M | $2.786 \pm 0.453$ |  |  |  | $K^o, h, E_l, \alpha_c, R_a$           |  |
| 92 | C | $2.778 \pm 0.468$ |  |  |  | $K^o, h, E_l, \alpha_c, R_a$           |  |
|    |   |                   |  |  |  |                                        |  |

**Legend:**  $\alpha$ -helical tendencies ( $P_\alpha$ );  $\beta$ -structure tendencies ( $P_\beta$ ); Average # surrounding residues ( $N_s$ ); Bulkiness ( $B_l$ ); Buriedness ( $B_r$ ); Chromatographic index ( $R_F$ ); Coil tendencies ( $P_c$ ); Composition ( $c$ ); Compressibility ( $K^o$ ); Equilibrium Const. – ionization, COOH ( $pK'$ ); Helical contact energy ( $C_a$ ); Hydrophathy ( $h$ ); Isoelectric point ( $pH_i$ ); Long-range n.b. energy ( $E_l$ ); Mean r.m.s. fluctuation displacement. ( $F$ ); Molecular volume ( $M_v$ ); Molecular weight ( $M_w$ ); Normal. consensus hydrophobicity ( $H_{nc}$ ); Partial specific volume ( $V^o$ ); Polar requirement ( $P_r$ ); Polarity ( $p$ ); Power to be – C-term.  $\alpha$ -helix ( $\alpha_c$ ); Power to be – middle,  $\alpha$ -helix ( $\alpha_m$ ); Power to be – N-term.,  $\alpha$ -helix ( $\alpha_n$ ); Refractive index ( $\mu$ ); Sh.- & med.-range n.b. energy ( $E_{sm}$ ); Solvent accessible reduct. ratio ( $R_a$ ); Surrounding hydrophobicity ( $H_p$ ); Thermodynamics transfer hydrophobicity ( $H_t$ ); Total n.b. energy ( $E_t$ ); Turn tendencies ( $P$ )

### Legend (tabular format)

| Properties                             | Symbol     | Property type |
|----------------------------------------|------------|---------------|
| Equil. Const. – ioniza., COOH          | $pK'$      | Chemical      |
| Average # surrounding residues         | $N_s$      | Physical      |
| Bulkiness                              | $B_l$      | Physical      |
| Buriedness                             | $B_r$      | Physical      |
| Chromatographic index                  | $R_F$      | Physical      |
| Coil tendencies                        | $P_c$      | Physical      |
| Composition                            | $c$        | Physical      |
| Compressibility                        | $K^o$      | Physical      |
| Helical contact energy/area            | $C_a$      | Physical      |
| Hydropathy                             | $h$        | Physical      |
| Isoelectric point                      | $pH_i$     | Physical      |
| Long-range n.b. energy                 | $E_l$      | Physical      |
| Mean r.m.s. fluctuat. displace.        | $F$        | Physical      |
| Molecular volume                       | $M_v$      | Physical      |
| Molecular weight                       | $M_w$      | Physical      |
| Normal. consensus hydrophob.           | $H_{nc}$   | Physical      |
| Partial specific volume                | $V^o$      | Physical      |
| Polar requirement                      | $P_r$      | Physical      |
| Polarity                               | $p$        | Physical      |
| Power to be – C-term. $\alpha$ -helix  | $\alpha_c$ | Physical      |
| Power to be – middle, $\alpha$ -helix  | $\alpha_m$ | Physical      |
| Power to be – N-term., $\alpha$ -helix | $\alpha_n$ | Physical      |
| Refractive index                       | $\mu$      | Physical      |
| Sh.- & med.-range n.b. energy          | $E_{sm}$   | Physical      |
| Solvent accessible reduct. ratio       | $R_a$      | Physical      |
| Surrounding hydrophobicity             | $H_p$      | Physical      |
| Thermodyn. transfer hydrophob.         | $H_t$      | Physical      |
| Total n.b. energy                      | $E_t$      | Physical      |
| Turn tendencies                        | $P$        | Physical      |
| $\alpha$ -helical tendencies           | $P_\alpha$ | Physical      |
| $\beta$ -structure tendencies          | $P_\beta$  | Physical      |

**Supplementary Table S4:** Paralytic and lethal effects of funnel-web spider venoms determined 1 h and 24 h after injection into adult sheep blowflies (*L. cuprina*). Table values are in µg/g.

| Species & (ID)                           | Gender | PD <sub>50</sub> |      | LD <sub>50</sub> |       |
|------------------------------------------|--------|------------------|------|------------------|-------|
|                                          |        | 1h               | 24h  | 1h               | 24h   |
| <i>H. cerberea</i> (sp.1)                | female | 8.5              | 10.9 | 76.2             | 32.3  |
| <i>H. cerberea</i> (sp.3)                | female | 7.5              | 11.4 | 173.6            | 52.2  |
| <i>H. infensa</i> (Orchid Beach, sp.5)   | female | 10.2             | 5.9  | 61.0             | 17.8  |
| <i>H. infensa</i> (Mapleton Falls, sp.6) | female | 4.6              | 3.9  | 26.4             | 11.5  |
| <i>H. formidabilis</i> (Tamborine, sp.7) | female | 4.0              | 5.5  | 62.5             | 64.3  |
| <i>H. formidabilis</i> (Tamborine, sp.8) | female | 11.4             | 14.4 | 74.1             | 85.0  |
| <i>A. robustus</i> (P494)                | female | 103.9            | 40.9 | >500             | >500  |
| <i>A. robustus</i> (P495)                | male   | >500             | 57.5 | >500             | 385.1 |
